# Supplementary material
Source: HighWire-hosted journal article supplement (https://www.cancerbiomed.org/content/18/2/604)
Supplement: media-1 [file media-1.pdf]

# Supplementary materials

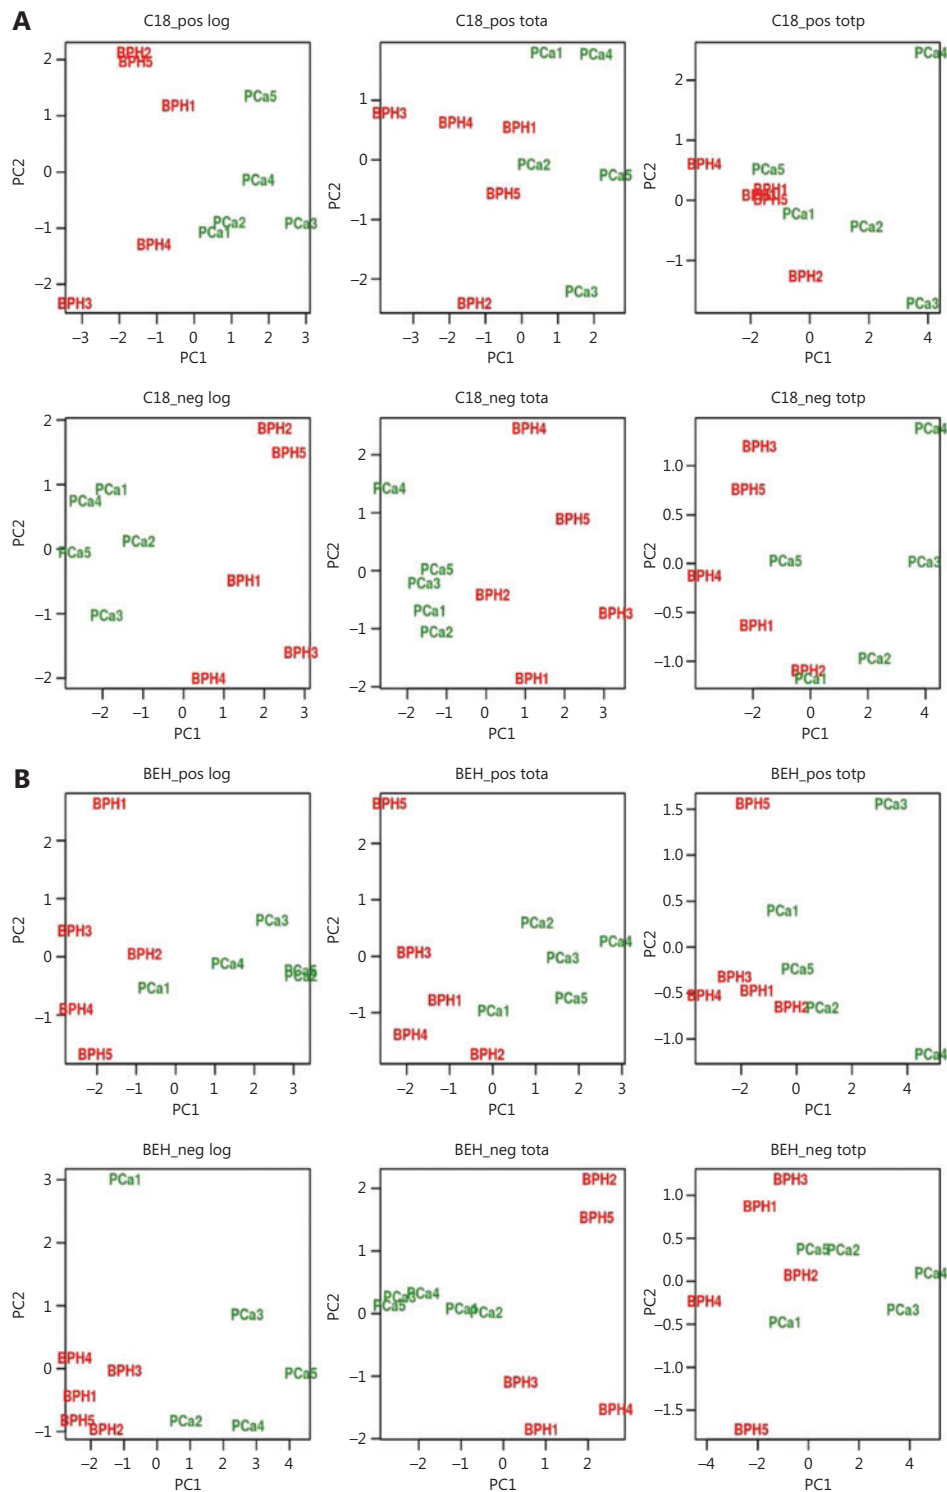

**Figure S1** Untargeted metabolomics analysis of BPH and PCa patients: unsupervised principal component analysis score for C18 (A) and BEH amide (B) column separation in positive (pos) and negative (neg) mode assessing the clustering of the BPH (red) and PCa (green) patients performed on identified metabolites upon logarithmic (log), total area (tota), protein content (totp) normalization approach. BPH, benign prostatic hyperplasia; PCa, prostate cancer; pos, positive; neg, negative; log, logarithmic; tota, total area; totp, protein content.

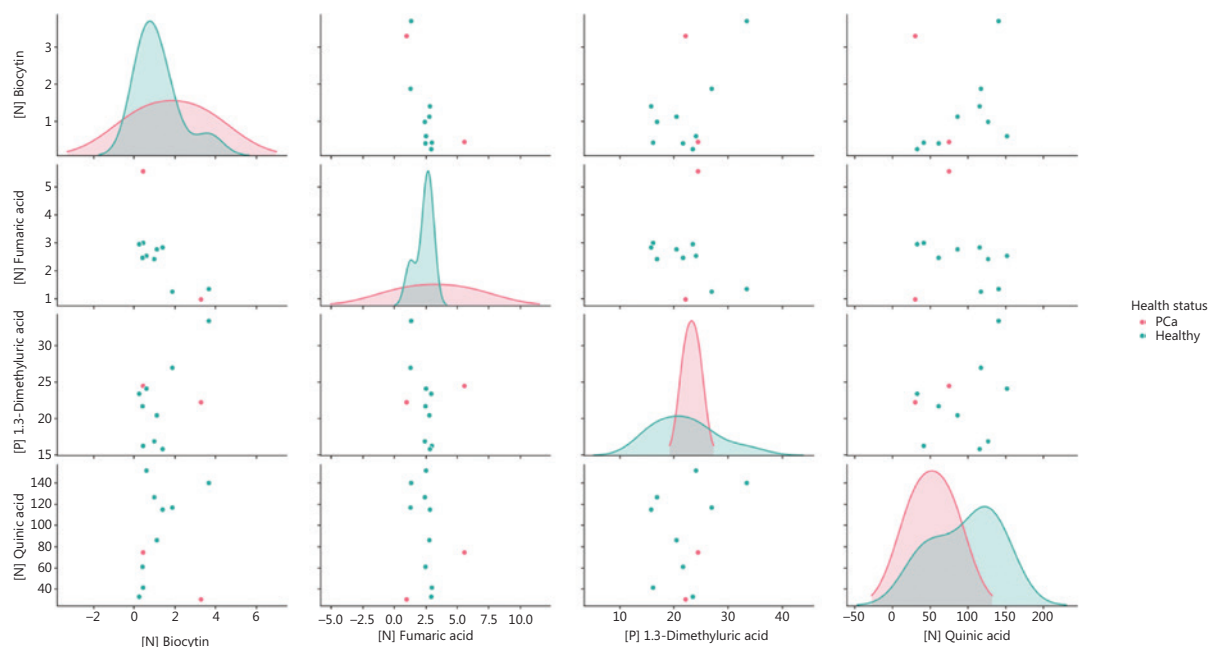

**Figure S2** Data distribution of the more predictive variables for Prostate Imaging Reporting and Data System 1-2. Scatter plots and distributions of all pairs of predictive variables.

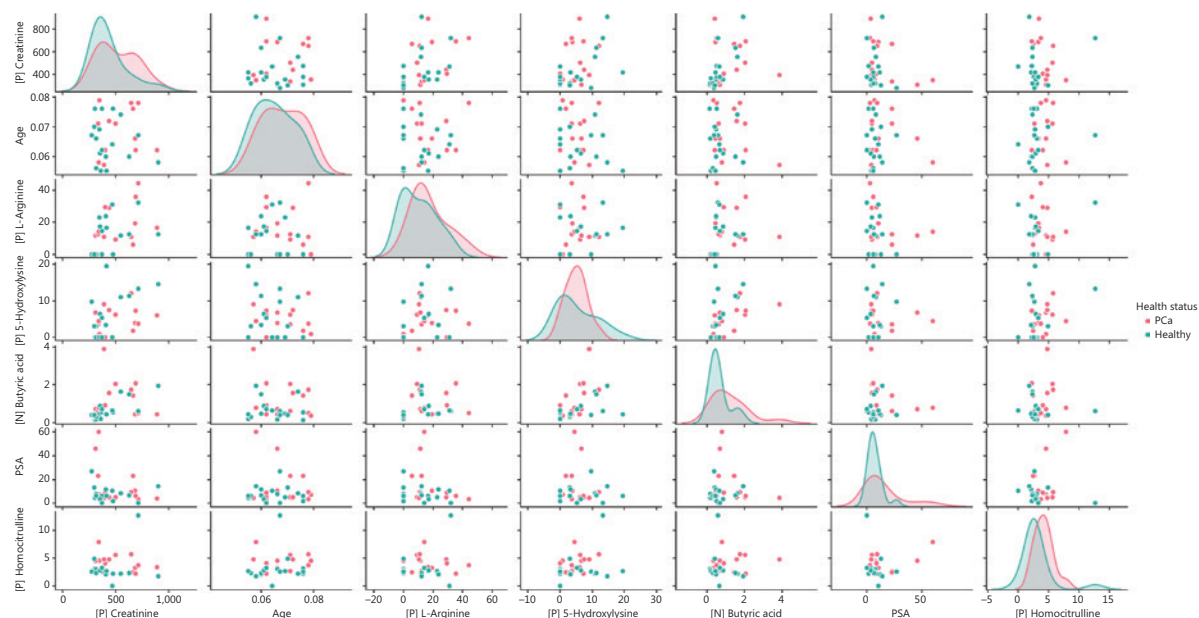

**Figure S3** Data distribution of the more predictive variables for Prostate Imaging Reporting and Data System 3. Scatter plots and distributions of all pairs of predictive variables.

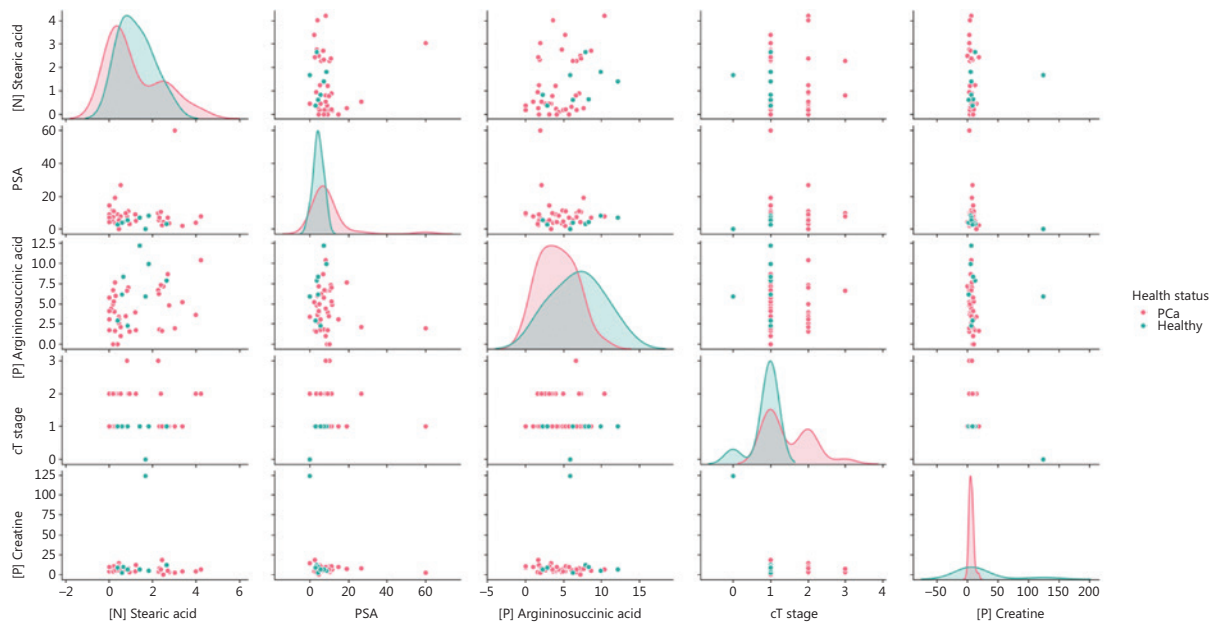

**Figure S4** Data distribution of the more predictive variables for Prostate Imaging Reporting and Data System 4–5. Scatter plots and distributions of all pairs of predictive variables.

**Table S3** Metabolites used for developing the predictive model. Upon selection of 10 metabolites with the most marked significant differences in each comparison (all patients and only Prostate Imaging Reporting and Data System 3, positive and negative polarities), the top 31 metabolites were considered as candidate variables for developing a predictive model of patient state

| POS/NEG | Metabolites                    |
|---------|--------------------------------|
| POS     | 1,3-Dimethyluric acid          |
| POS     | 2-Pyrrolidinone                |
| POS     | 4-Aminohippuric acid           |
| POS     | 5-Hydroxylysine                |
| POS     | 7-Methylguanine                |
| POS     | Argininosuccinic acid          |
| POS     | Creatine                       |
| POS     | Creatinine                     |
| POS     | Glycyl-L-leucine               |
| POS     | Hippuric acid                  |
| POS     | Homocitrulline                 |
| POS     | L-Arginine                     |
| POS     | L-Cystathionine                |
| POS     | L-Serine                       |
| POS     | N-acetyl-L-methionine          |
| NEG     | 2-Hydroxy-2-methylbutyric acid |
| NEG     | Acetylcysteine                 |
| NEG     | $\alpha$ -Aspartyl-lysine      |
| NEG     | Biocytin                       |
| NEG     | Butyric acid                   |
| NEG     | Canrenone                      |
| NEG     | Creatinine                     |
| NEG     | Fumaric acid                   |
| NEG     | Glyceric acid                  |
| NEG     | Histamine                      |
| NEG     | Isovalerylglycine              |
| NEG     | L-Aspartyl-L-phenylalanine     |
| NEG     | Malonic acid                   |
| NEG     | Quinic acid                    |
| NEG     | Stearic acid                   |
| NEG     | Xanthosine                     |

**Table S4** Clinical variables and the relative description

| Clinical variables | Description                                |
|--------------------|--------------------------------------------|
| PI-RADS            | Prostate Imaging Reporting and Data System |
| Age                | Age of the patient                         |
| cT stage           | Clinical T category                        |
| Prostate volume    | Volume of the prostate                     |
| PSA                | Serum prostate-specific antigen            |

**Table S5** PI-RADS classification with the relative number of 92 patients analyzed in the metabolomics approach

| PI-RADS | Description           | No. samples per group |
|---------|-----------------------|-----------------------|
| 1–2     | Probably healthy      | 11                    |
| 3       | Difficult to diagnose | 32                    |
| 4–5     | Probably sick         | 46                    |
| NA      | Not assessed          | 3                     |
| Total   |                       | 92                    |

PI-RADS, Prostate Imaging Reporting and Data System; NA, not assessed.

**Table S6** Percentage of accuracy in the three subsets of samples (PI-RADS 1–2, 3, and 4–5). The relative percentage of accuracy for the prediction model trained using our meta classifier, only PI-RADS classification, clinical variables including PI-RADS classification, or Prostarix™ kit metabolites

| PI-RADS | Accuracy (%) |              |                                      |                        |
|---------|--------------|--------------|--------------------------------------|------------------------|
|         | MC           | PI-RADS only | Clinical variables including PI-RADS | Prostarix metabolites™ |
| 1–2     | 100          | 81.81        | 72.72                                | 18.18                  |
| 3       | 87.5         | 56.25        | 65.63                                | 46.88                  |
| 4–5     | 89.13        | 82.61        | 76.09                                | 82.61                  |
| All     | 89.89        | 72.83        | 71.74                                | 60.87                  |

PI-RADS, Prostate Imaging Reporting and Data System; MC, meta classifier.
